# Supplementary material for: Perception Regarding Knowledge of COVID-19 Prevention in a Sample of a Middle Eastern and North African (MENA) Community in Houston, Texas, USA
Source: MDPI journal article supplement (doi:10.3390/ijerph19010524), 2022-01-04
Supplement: s1 [file s1]

[Project Home](#) [Project Setup](#) [Online Designer](#) [Data Dictionary](#) [Codebook](#)[Online Designer](#) ▼

Since this project is currently in **PRODUCTION**, changes will not be made in real time. [Tell me more](#)

[Submit Changes for Review](#)Fields to be added: **0** / Total resulting field count: **129**Fields to be deleted: **0** / Existing field count: **129**[Remove all drafted changes](#)[View detailed summary of all drafted changes](#)[Create snapshot of instruments](#)

Last snapshot: never ?

[VIDEO: How to use this page](#)

This page allows you to build and customize your data collection instruments one field at a time. You may add new fields or edit existing ones. New fields may be added by clicking the **Add Field** buttons. You can begin editing an existing field by clicking on the  **Edit** icon. If you decide that you do not want to keep a field, you can simply delete it by clicking on the  **Delete** icon. To reorder the fields, simply **drag and drop** a field to a different position within the form below.

[Return to list of instruments](#)[Survey settings](#)[Previous instrument](#)[Next instrument](#)Current instrument: **Consent form**[Preview instrument](#)[Add Field](#)[Add Matrix of Fields](#)[Import from Field Bank](#)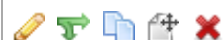

Variable: cover\_letter\_e

**Title of research study:** Assessing awareness, access, and acceptance of COVID-19 vaccinations in the Middle Eastern and North African (MENA) community of the Greater Houston area.

**Investigator: Name:** Samina Salim, PhD  
**Department:** Pharmacological and Pharmaceutical Sciences  
**Telephone Number:** 713-743-1776  
**Email Address:** [ssalim2@central.uh.edu](mailto:ssalim2@central.uh.edu)

**Key Information:**

The following focused information is being presented to assist you in understanding the key elements of this study, as well as the basic reasons why you may or may not wish to consider taking part. This section is only a summary; more detailed information, including how to contact the research team for additional information or questions, follows within the remainder of this document under the "Detailed Information" heading.

**What should I know about a research study?**

- Someone will explain this research study to you.
- Taking part in the research is voluntary; whether or not you take part is up to you.
- You can choose not to take part.
- You can agree to take part and later change your mind.
- Your decision will not be held against you.
- You can ask all the questions you want before you decide, and can ask questions at any time during the study.

We invite you to take part in a research study, the purpose of which is, to contribute to a greater understanding of the health needs of Arab Americans during the COVID-19 outbreak. You have been asked to participate in this study because you meet the following criteria:

- You are an adult ( $\geq 18$  years)
- You are of Arab origin living in the United States in the greater Houston area

Your participation in the research involves completing a survey which will include questions about demographic information, general health, and the coronavirus (COVID-19). The survey should take approximately 10-15 minutes to complete and will be administered online. We hope to gain a better understanding of how Arab Americans are affected by COVID-19. As a token of appreciation for completing the survey, we will provide a \$10 Amazon e-gift card for your participation if you are interested in receiving one.

**Detailed Information:**

The following is more detailed information about this study, in addition to the information listed above.

**Why is this research being done?**

Little is known about the health risks of Arab Americans with regard to the COVID-19 pandemic. Arab Americans may have a number of risk factors that put them at increased risk of exposure to and complications from COVID-19. There has never been a survey done to assess Arab American health needs in the United States of America perhaps due to a lack of funding and/or an inability to capture Arab Americans from standard race and ethnicity survey measures. Additionally, because Arab Americans are classified as White on racial and ethnic surveys, there is no way to extract information on Arab American health from existing surveys on COVID-19. We therefore are conducting one of the first representative surveys on Arab American health in the Houston area, to understand their health needs and risks, specifically related to COVID-19.

The study is funded through the 2021 Houston Global Health Collaborative Student Research and Service Grant awarded to college of pharmacy P4 student Sarah Zeidat, under the mentorship of Dr. Samina Salim (PI). The purpose is to examine the understanding, access and uptake of the COVID-19 vaccination among Arab Americans (MENA group in the Houston area). The participants will be asked to complete a survey which will include questions about coronavirus (COVID-19), general health questions, and demographic information. The survey should take approximately 10-15 minutes to complete and will be administered on-line. Through the survey, we will examine COVID-19 vaccine hesitancy, awareness and acceptance in the MENA group settled in the greater Houston area.

**How long will the research last?**

Your participation ends as soon as you finish the survey. The participation is 100% virtual (online).

**How many people will be studied?**

We expect to enroll about 250 people in this research study.

**What happens if I say yes, I want to be in this research?**

If you agree to participate in this study, you will participate one time, in an online survey questionnaire in your preferred language, English or Arabic.

**What happens if I do not want to be in this research?**

You can choose not to take part in the research and it will not be held against you. If you are a student, a decision to take part or not, or to withdraw from the research will have no effect on your grades or standing with the University of Houston.

**What happens if I say yes, but I change my mind later?**

You can leave the research at any time and it will not be held against you. If you decide to leave the research, contact the investigator so that the investigator can update the record in the research study. If you stop being in the research, already collected data that still includes your survey information may not be removed from the study record.

**Is there any way being in this study could be bad for me?**

There are no foreseeable risks related to the procedures conducted as part of this study. We do not expect any risks related to the research activities. If you choose to take part in the survey and undergo a negative event you feel is related to the study, please contact the researcher/study team PI Dr. Samina Salim. However, loss of confidentiality regarding research information is a possibility, although the risk is small. Efforts will be made to limit the use and disclosure of your personal information, to organizations that might need to review this information.

**Will I get anything for being in this study?**

A \$10 amazon gift card will be provided for participation in the survey questionnaire to interested individuals.

**Will being in this study help me in any way?**

There are no known benefits to you from your taking part in this research. However, possible benefits to others include advancing knowledge and information about Arab health in the US.

**What happens to the information collected for the research?**

Your taking part in this project is anonymous, and information you provide cannot be linked to your identity. We may publish the results of this research.

**Can I be removed from the research without my OK?**

The person in charge of the research study or the sponsor can remove you from the research study without your approval if your survey was incomplete.

**Who can I talk to?**

If you have questions, concerns, or complaints, or think the research has hurt you, you should talk to the research team at

**PRINCIPAL INVESTIGATOR:**

Name: Samina Salim

Department: Pharmacological and Pharmaceutical Sciences

Telephone Number: 713-743-1776;

Email Address: [ssalim2@central.uh.edu](mailto:ssalim2@central.uh.edu)

This research has been reviewed and approved by the University of Houston Institutional Review Board (IRB). You may also talk to them at (713) 743-9204 or [cphs@central.uh.edu](mailto:cphs@central.uh.edu) if:

- Your questions, concerns, or complaints are not being answered by the research team.
- You cannot reach the research team.
- You want to talk to someone besides the research team.
- You have questions about your rights as a research subject.
- You want to get information or provide input about this research.

[Add Field](#)[Add Matrix of Fields](#)[Import from Field Bank](#)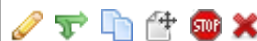

Variable: agree\_e

**I have read the consent information and agree to take part in the research**

☐ Yes☐ No

\* must provide value

[Add Field](#)[Add Matrix of Fields](#)[Import from Field Bank](#)



[Project Home](#) [Project Setup](#) [Online Designer](#) [Data Dictionary](#) [Codebook](#)[Online Designer](#) ▼

Since this project is currently in **PRODUCTION**, changes will not be made in real time. [Tell me more](#)

[Submit Changes for Review](#)Fields to be added: **0** / Total resulting field count: **129**Fields to be deleted: **0** / Existing field count: **129**[Remove all drafted changes](#)[View detailed summary of all drafted changes](#)[Create snapshot of instruments](#)

Last snapshot: never ?

[VIDEO: How to use this page](#)

This page allows you to build and customize your data collection instruments one field at a time. You may add new fields or edit existing ones. New fields may be added by clicking the **Add Field** buttons. You can begin editing an existing field by clicking on the **Edit** icon. If you decide that you do not want to keep a field, you can simply delete it by clicking on the **Delete** icon. To reorder the fields, simply **drag and drop** a field to a different position within the form below.

[Return to list of instruments](#)[Survey settings](#)[Previous instrument](#)[Next instrument](#)Current instrument: **Consent form (Arabic)**[Return to edit view](#)

NOTE: Please be aware that branching logic and calculated fields will not function on this page. They only work on the survey pages and data entry forms.

عنوان الدراسة البحثية: تقييم الوعي وإمكانية الوصول وقبول مطعوم COVID-19 في مجتمع الشرق الأوسط وشمال إفريقيا (MENA) في منطقة هيوستن الكبرى.

الباحث الأساسي:

الاسم: الدكتورة سامينا سالم

القسم: الصيدلة وعلم الأدوية

رقم الهاتف: 1776-743-713

البريد الإلكتروني: ssalim2@central.uh.edu

معلومات أساسية:

نقدم لكم المعلومات التالية لمساعدتكم على فهم العناصر الأساسية في هذه الدراسة, كذلك لتزويديكم بالأسباب الرئيسية التي قد تجعلكم ترغبون أو لا ترغبون بأن تكونوا جزءاً من هذه الدراسة. هذا الفصل فقط ملخص , ستجدون معلومات أوفى عن هذه الدراسة و كيفية الاتصال بفريق البحث اذا كان لديكم أي استفسار او كنتم ترغبون بالحصول على معلومات اضافية لاحقاً في فصل "معلومات تفصيلية".

### ماذا علي ان أعرف عن هذه الدراسة البحثية ؟

- سيقوم ائدهم بتوضيح هذه الدراسة البحثية لك.
- المشاركة في البحث تطوعية, فالامر يعود لك بالاجاب او الرفض.
- يمكنك اختيار عدم المشاركة .
- يمكنك الموافقة على المشاركة ولك الحق في تغيير رأيك بأي وقت لاحقاً.
- لن يكون لقرارك اي اثر عليك.
- يحق لك طرح اي سؤال قبل قرار المشاركة بالدراسة او حتى لاحقاً في أي وقت اثناء الدراسة.

أنت مدعو للمشاركة في بحث يهدف للحصول على فهم أفضل للاحتياجات الصحية للأمريكيين العرب أثناء تفشي COVID-19. يُطلب منك المشاركة في الدراسة لأنك تتطبق عليك المواصفات التالية:

- شخص بالغ (العمر +18 سنة),

-من أصل / ثقافة / عرق من بلد يتحدث العربية و تعيش في الولايات المتحدة في منطقة هيوستن.

بشكل عام ، تتضمن مشاركتك في البحث إكمال استبيان يتضمن أسئلة حول فيروس كورونا (COVID-19) وأسئلة صحية عامة ومعلومات ديموغرافية. نتوقع أن يستغرق ملء الاستبيان حوالي 10-15 دقيقة, وسيتم إدارته عبر الإنترنت.

نأمل في الحصول على فهم أفضل لكيفية تأثير الأمريكيين العرب ب COVID-19 . كتقدير لاستكمال الاستبيان ، سنقدم بطاقة هدايا بقيمة 10 دولارات أمريكية مقابل مشاركتك, اذا كنت مهتما بالحصول على واحدة.

### معلومات تفصيلية:

فيما يلي معلومات أكثر تفصيلاً حول هذه الدراسة ، بالإضافة إلى المعلومات المذكورة أعلاه

### لماذا يتم عمل هذه الدراسة؟

لا يُعرف سوى القليل عن المخاطر الصحية للأمريكيين العرب فيما يتعلق بوباء كوفيد 19

قد يكون لدى الأمريكيين العرب عدد من العوامل التي تعرضهم لخطر متزايد للتعرض لمضاعفات كوفيد 19 . لم يتم إجراء أي دراسة استقصائية لتقييم الاحتياجات الصحية للأمريكيين العرب في الولايات المتحدة الأمريكية ربما بسبب نقص التمويل و / أو عدم القدرة على التقاط العرب الأمريكيين من مقاييس استطلاعات العرق والنسب القياسي. بالإضافة إلى ذلك ، نظرًا لتصنيف الأمريكيين العرب على أنهم أبيض في الدراسات الاستقصائية العرقية والإثنية ، فلا توجد طريقة لاستخراج معلومات عن صحة الأمريكيين العرب من الاستطلاعات الحالية. لذلك نجري واحدة من أولى الدراسات الاستقصائية التمثيلية حول صحة الأمريكيين العرب في منطقة هيوستن ، لفهم احتياجاتهم الصحية ومخاطرهم ، وخاصة المتعلقة بكوفيد 19. الغرض من هذه الدراسة (الممولة

من خلال منحة هيوستن العالمية للبحوث والخدمات التعاونية للصحة العالمية ، 2021 الممنوحة لطالبة كلية الصيدلة سارة زيدات ، و المشرفة و الباحث الرئيسي: الدكتورة سامينا سالم) هو فحص الفهم والوصول واخذ التطعيم ضد فيروس كورونا بين الأمريكيين العرب (مجموعة الشرق الأوسط وشمال إفريقيا تشمل اللاجئين في منطقة هيوستن). سيطلب من المشاركين إكمال استبيان يتضمن أسئلة حول فيروس كورونا (كوفيد 19) وأسئلة صحية عامة ومعلومات ديموغرافية. يستغرق الاستبيان حوالي 10-15 دقيقة لإكماله وسيتم إدارته عبر الإنترنت. من خلال الاستطلاع ، سنفحص تردد أخذ المطعم والوعي والقبول في مجموعة الشرق الأوسط وشمال إفريقيا المستقرة في منطقة هيوستن الكبرى

### كم من الوقت يحتاج هذا البحث

تنتهي مشاركتك بمجرد الانتهاء من الاستبيان المشاركة. المشاركة عبر الانترنت 100٪ (أونلاين).

### كم شخص سيشترك بالدراسة؟

نتوقع تسجيل حوالي 250 شخصًا في هذه الدراسة البحثية.

### ماذا يحدث إذا قلت نعم ، أريد أن أكون في هذا البحث؟

إذا وافقت على المشاركة في هذه الدراسة ، فسوف تشارك في استبيان استطلاع عبر الإنترنت بلغتك المفضلة ، الإنجليزية أو العربية.

### ماذا يحدث إذا كنت لا ترغب المشاركة في هذا البحث ؟

يمكنك اختيار عدم الموافقة على المشاركة في هذا البحث, ولن يتم اعتبار ذلك ضدك. ان اختيار عدم المشاركة لن يترتب عليه اي عقوبة أو خسارة في الفائدة المستحقة لك من أي جهة. اذا كنت طالباً في جامعة هيوستن , قرارك بالموافقة على المشاركة أو عدم الموافقة , أو الانسحاب بعد الموافقة , لن يؤثر على علامتك أو موقعك بالجامعة . الاختيار البديل للمشاركة بالنسبة لك هو عدم المشاركة.

### ماذا سيحدث لو قلت نعم لكنني غيرت رأيي لاحقاً ؟

يمكنك سحب موافقتك على المشاركة في الدراسة والانسحاب من البحث في اي وقت, و لن يحسب هذا ضدك. ان كان خيارك التوقف عن المشاركة في البحث في , تواصل مع فريق البحث لتعديل بيانات الدراسة.

أن كان خيارك التوقف عن المشاركة في البحث, سيتم حذف جميع البيانات المتعلقة بكم, والتي تتضمن اسمك و جميع المعلومات الشخصية, من سجلات الدراسة.

### هل من الممكن أن ينتج عن المشاركة بهذه الدراسة شيء سيء بالنسبة لي؟

لا نتوقع حدوث أي مخاطر متعلقة بالمشاركة بالبحث. إذا كان خيارك المشاركة بالبحث ثم واجهت أحداث سلبية تعتقد انها قد تكون متعلقة بالمشاركة بالبحث, يرجى الاتصال بفريق البحث المذكور و الباحث الاساسي الدكتور سمينه سالم. ومع ذلك, هناك احتمال فقدان بعض الخصوصية المتعلقة بالمعلومات المحصلة من البحث, بالرغم من أن هذا الاحتمال ضئيل جداً, سنبدل أقصى ما بوسعنا للحد من افشاء المعلومات الشخصية, بما يتضمن نتائج البحث, للمنظمات التي قد تحتاج مراجعة هذه المعلومات.

### هل سأحصل على اي شيء لقاء المشاركة في هذه الدراسة ؟

سيتم تقديم بطاقة هدايا بقيمة 10 دولارًا للمشاركة بتعبئة الاستبيانات, للمهتمين بالحصول على واحدة.



هل لمشاركتي في هذه الدراسة فائدة بأي شكل من الاشكال ؟

لا يمكننا أن نعد بأي فوائد لك أو للآخرين من مشاركتك في هذا البحث. ومع ذلك ، تشمل الفوائد المحتملة اكتساب المعرفة والمعلومات حول صحة العرب في الولايات المتحدة.

ماذا يحدث للمعلومات التي تم جمعها للبحث ؟

مشاركتك في هذا المشروع مجهولة المصدر ، والمعلومات التي تقدمها لا يمكن ربطها بهويتك. قد يتم نشر نتائج هذا البحث.

هل يمكن الغاء مشاركتي دون موافقتي؟

بإمكان الشخص المسؤول عن البحث انهاء مشاركتك بالبحث دون موافقتك اذا كان الاستبيان الذي قدمته غير مكتمل.

مع من يمكنني التحدث؟

إذا كان لديك اسئله أو مخاوف أو شكاوى ، أو تعتقد أن البحث قد أضر بك، يجب عليك التحدث إلى فريق البحث:

الباحث الاساسي:

الاسم: سامينا سالم

القسم : الصيدلة وعلم الأدوية

رقم الهاتف: 1776-743-713

البريد الالكتروني: [ssalim2@central.uh.edu](mailto:ssalim2@central.uh.edu)

لقد قام مجلس المراجعة المؤسسية لجامعه هيوستن (IRB) بمراجعة هذا البحث والموافقة عليه. يمكنك أيضا التحدث معهم على الرقم (713-743-9204) , أوالبريد الالكتروني [cphs@central.uh.edu](mailto:cphs@central.uh.edu) إذا:

- لم يتم الرد على أسئلتك أو مخاوفك أو شكاواك من قبل فريق البحث.
- لم تتمكن من الوصول إلى فريق البحث.
- أردت التحدث إلى شخص آخر بالإضافة لفريق البحث.
- كان لديك اسئله حول حقوقك كموضوع بحث.
- كنت ترغب في الحصول على معلومات أو تقديم مدخلات حول هذا البحث.

لقد قرأت معلومات الموافقة وأوافق على المشاركة في البحث

\* must provide value

- ☐ Yes  
☐ No



[Online Designer](#)

Since this project is currently in **PRODUCTION**, changes will not be made in real time. [Tell me more](#)

[Submit Changes for Review](#)
Fields to be added: **0** / Total resulting field count: **129**Fields to be deleted: **0** / Existing field count: **129**
[Remove all drafted changes](#)
[View detailed summary of all drafted changes](#)
[Create snapshot of instruments](#)
[VIDEO: How to use this page](#)

Last snapshot: never ?

This page allows you to build and customize your data collection instruments one field at a time. You may add new fields or edit existing ones. New fields may be added by clicking the **Add Field** buttons. You can begin editing an existing field by clicking on the **Edit** icon. If you decide that you do not want to keep a field, you can simply delete it by clicking on the **Delete** icon. To reorder the fields, simply **drag and drop** a field to a different position within the form below.

[Return to list of instruments](#)
[Survey settings](#)
[Previous instrument](#)
[Next instrument](#)
Current instrument: **Sociodemographics**
[Preview instrument](#)

[Add Field](#)
[Add Matrix of Fields](#)
[Import from Field Bank](#)

Variable: socio\_1\_1

**Are you an Arab American who lives in the United States and is 18 years old or older?**

NOTE: An Arab American is someone who identifies as ARAB and LIVES in the United States (you do not have to be a citizen)

هل أنت عربي أمريكي مقيم في الولايات المتحدة وعمرك 18 عاماً فما فوق؟

ملاحظة: الأمريكي العربي هو شخص يعرّف نفسه بأنه عربي ويعيش في الولايات المتحدة (الأمريكية) لا يشترط أن تكون مواطناً أمريكياً

☐ Yes

☐ No

\* must provide value

[Add Field](#)
[Add Matrix of Fields](#)
[Import from Field Bank](#)

Variable: socio\_1

**How old are you?**

كم عمرك؟

\* must provide value

[Add Field](#)
[Add Matrix of Fields](#)
[Import from Field Bank](#)

Variable: socio\_2

**What is your gender?**

ما هو جنسك؟

\* must provide value

☐ Male ذكر

☐ Female أنثى

☐ Transgender man رجل عابر جنسياً

☐ Transgender woman امرأة عابرة جنسياً

☐ Non-Binary غير ثنائي

☐ Other

[Add Field](#)
[Add Matrix of Fields](#)
[Import from Field Bank](#)

Variable: socio\_2\_1 Branching logic: [socio\_2]="5"

**Other specify**

غير ذلك

Add Field Add Matrix of Fields Import from Field Bank

Variable: socio\_3

### How many years of education have you completed?

ما هو أعلى مستوى تعليمي حصلت عليه؟

\* must provide value

- ☐ High school or less الثانوية العامة أو أقل  
☐ Some college or associate's degree درجة الكلية أو الزمالة  
☐ College degree شهادة جامعية  
☐ Graduate degree شهادة الدراسات العليا

Add Field Add Matrix of Fields Import from Field Bank

Variable: socio\_6

### What is your zipcode?

NOTE: We are asking for your zipcode because we generally want to see how the health of Arab Houstonians is different in different regions of the Houston. This can help us understand how to improve health services and outreach. Your responses will remain anonymous. We will not be able to identify you in any way.

ما هو الرمز البريدي الخاص بك؟

ملاحظة: نطلب الرمز البريدي الخاص بك لأننا نريد أن نكتشف بشكل عام كيف قد تختلف صحة العرب الأمريكيين في المناطق المختلفة من الولايات المتحدة. يمكن أن يساعدنا ذلك على فهم كيفية وإمكانية تحسين الخدمات الصحية والتوعية. ستبقى ردودك مجهولة الهوية. لن نتمكن من التعرف عليك بأي شكل من الأشكال.

\* must provide value

Add Field Add Matrix of Fields Import from Field Bank

Variable: socio\_7

### What is your marital status?

ما هي حالتك الاجتماعية؟

\* must provide value

- ☐ Married متزوج  
☐ Widowed أرمل  
☐ Divorced مطلق  
☐ Separated منفصل  
☐ Never married غير متزوج  
☐ Living with a partner أعيش مع شريكي  
☐ Other غير ذلك

Add Field Add Matrix of Fields Import from Field Bank

Variable: socio\_9

### Which of the following best describes the place that you live?

أي مما يلي يصف المكان الذي تعيش فيه بالشكل الأفضل؟

\* must provide value

- ☐ I or someone in my household owns the place where I live أنا أو شخص ما في بيتي يمتلك المكان الذي أعيش فيه  
☐ I rent the place where I live أنا أستاذ المكان الذي أعيش فيه  
☐ I occupy the place where I live without payment or cash rent أنا أسكن في المكان الذي أعيش فيه بدون دفع أو إيجار نقدي

Add Field Add Matrix of Fields Import from Field Bank

Variable: socio\_10

We will now ask you about the total household income for all persons who live in your home, including income from sources such as wages, salaries, Social Security or retirement benefits, help from relatives and so fourth.

### What is your annual household income before taxes?

سوف نسألك الآن عن إجمالي دخل الأسرة لجميع الأشخاص الذين يعيشون في منزلك، بما في ذلك مصادر الدخل مثل الأجور والرواتب، والضمان الاجتماعي أو استحقاقات التقاعد، والمساعدة من الأقارب وما إلى ذلك.

ما هو دخل أسرتك السنوي قبل الضرائب

\* must provide value

- ☐ \$0 to less than \$5,000  
☐ \$5,000 to less than \$15,000  
☐ \$15,000 to less than \$25,000  
☐ \$25,000 to less than \$35,000  
☐ \$35,000 to less than \$45,000  
☐ \$45,000 to less than \$55,000  
☐ \$55,000 to less than \$65,000  
☐ \$65,000 to less than \$75,000  
☐ \$75,000 to less than \$100,000  
☐ \$100,000 and over 100 (>\$100,000)

Add Field
Add Matrix of Fields
Import from Field Bank





Variable: socio\_11

**Are you a United States citizen?**

هل أنت مواطن أمريكي؟

\* must provide value

☐ Yes نعم  
☐ No لا  
☐ I don't know لا أعلم

Add Field
Add Matrix of Fields
Import from Field Bank





Variable: socio\_12

**Were you born in the United States?**

هل ولدت في الولايات المتحدة؟

\* must provide value

☐ Yes  
☐ No

Add Field
Add Matrix of Fields
Import from Field Bank




Variable: socio\_13    Branching logic: [socio\_12]="2"

**Where were you born?**

أين ولدت؟

\* must provide value

Add Field
Add Matrix of Fields
Import from Field Bank





Variable: socio\_14    Branching logic: [socio\_12]="2"

**How long have you lived in the United States?**

كم مدة إقامتك في الولايات المتحدة؟

\* must provide value

☐ 0-2 years (سنوات)  
☐ 3-5 years (سنوات)  
☐ 6-10 years (سنوات)  
☐ 10-14 years (سنوات)  
☐ 15-20 years (سنوات)  
☐ 20+ years (> 10 سنوات)

Add Field
Add Matrix of Fields
Import from Field Bank





Variable: socio\_15

**Were your parents born in the United States?**

هل والداك من مواليد الولايات المتحدة؟

\* must provide value

☐ Yes  
☐ No

Add Field
Add Matrix of Fields
Import from Field Bank




Variable: socio\_15\_1    Branching logic: [socio\_15]="0"

**Where was your mother born?**

أين ولدت والدتك؟

\* must provide value

Add Field
Add Matrix of Fields
Import from Field Bank




Variable: socio\_15\_2    Branching logic: [socio\_15]="0"

**Where was your father born?**

أين ولد والدك؟

\* must provide value

Add Field

Add Matrix of Fields

Import from Field Bank



Variable: socio\_17

**What is your race?** (select all that apply)

ما هو عرقك؟ (اختر كل ما ينطبق)

\* must provide value

☐ White أبيض

☐ Middle Eastern or North African الشرق الأوسط أو شمال أفريقيا

☐ Black or African American أسود أو أفريقي أمريكي

☐ American Indian or Alaska Native أمريكي هندي أو من سكان الاسكا

☐ Asian آسيوي

☐ Native Hawaiian or Pacific Islander من سكان هاواي أو جزر المحيط الهادئ

☐ Other غير ذلك

Add Field

Add Matrix of Fields

Import from Field Bank



Variable: socio\_17\_1    Branching logic: [socio\_17(6)]=1

**Other specify**

غير ذلك

Add Field

Add Matrix of Fields

Import from Field Bank



Variable: socio\_18

**How well do you understand English?**

ما هو مدى فهمك للغة الإنجليزية؟

\* must provide value

☐ Extremely well ممتاز

☐ Very well جيد جداً

☐ Moderately well جيد باعتدال

☐ Slightly well جيد قليلاً

☐ Not well at all ليس جيداً أبداً

Add Field

Add Matrix of Fields

Import from Field Bank



Variable: socio\_19

**How well do you understand Arabic?**

ما هو مدى فهمك للغة العربية؟

\* must provide value

☐ Extremely well ممتاز

☐ Very well جيد جداً

☐ Moderately well جيد باعتدال

☐ Slightly well جيد قليلاً

☐ Not well at all ليس جيداً أبداً

Add Field

Add Matrix of Fields

Import from Field Bank



Variable: socio\_20

**What is your religion?**

ما هي ديانتك؟

\* must provide value

☐ Christian مسيحي

☐ Muslim مسلم

☐ Jewish يهودي

☐ Hindhu هندوسي

☐ Buddhist بوذي

☐ Atheist ملحد

☐ Other غير ذلك

Add Field

Add Matrix of Fields

Import from Field Bank



Variable: socio\_20\_1    Branching logic: [socio\_20]=6

**Other specify**

حدد, غير ذلك

\* must provide value

Add Field

Add Matrix of Fields

Import from Field Bank



Variable: socio\_21

**How important is your religion to you?**

ما هي أهمية ديانتك بالنسبة إليك؟

\* must provide value

☐ Extremely important مهمة للغاية

☐ Very important مهمة جداً

☐ Moderately important مهمة بشكل معتدل

☐ Slightly important مهمة قليلاً

☐ Not at all important ليست مهمة أبداً

Add Field
Add Matrix of Fields
Import from Field Bank






Variable: socio\_22

Which of these options best describes your current work situation?

أي من هذه الخيارات يصف وضع عملك الحالي بشكل أفضل؟

\* must provide value

- ☐ Working full-time كامل بدوام
- ☐ Working part-time أعمل بدوام جزئي
- ☐ Looking for work or unemployed الباحث عن عمل أو عاطل عن العمل
- ☐ Retired متقاعد
- ☐ A homemaker رب منزل
- ☐ A student طالب
- ☐ On maternity or paternity leave في إجازة الأمومة أو الأبوة
- ☐ On illness or sick leave في حالة مرض أو في إجازة المرضية
- ☐ On disability في حالة الإعاقة
- ☐ Other غير ذلك

Add Field
Add Matrix of Fields
Import from Field Bank





Variable: socio\_22\_1 Branching logic: [socio\_22]="10"

Other specify

حدد, غير ذلك

\* must provide value

Add Field
Add Matrix of Fields
Import from Field Bank






Variable: socio\_23

Are you covered by any kind of health insurance or some other kind of health care plan?

هل أنت مغطى بأي نوع من التأمين الصحي أو أي نوع آخر من خطط الرعاية الصحية؟

\* must provide value

- ☐ Yes نعم
- ☐ No لا
- ☐ I don't know لا أعلم

Add Field
Add Matrix of Fields
Import from Field Bank






Variable: socio\_23\_1 Branching logic: [socio\_23]="1" or [socio\_23]="3"

What type of health insurance or health care coverage do you have?

ما هي أنواع التأمينات الصحية أو الرعاية الصحية التي تمتلكها؟

\* must provide value

- ☐ Health insurance paid for by an employer or a union تأمين صحي يدفعه صاحب العمل أو النقابة
- ☐ Health insurance you or your family pays for yourself تأمين صحي تدفعه أنت أو عائلتك لنفسك
- ☐ Medicare ميديكير
- ☐ Medicaid ميديكيد
- ☐ Some other kind of health insurance نوع آخر من التأمين الصحي
- ☐ No coverage of any type لا يوجد أي تأمين من أي نوع
- ☐ I don't know لا أعلم

Add Field
Add Matrix of Fields
Import from Field Bank

[Online Designer](#)

Since this project is currently in **PRODUCTION**, changes will not be made in real time. [Tell me more](#)

[Submit Changes for Review](#)

 Fields to be added: **0** / Total resulting field count: **129**

 Fields to be deleted: **0** / Existing field count: **129**
[Remove all drafted changes](#)
[View detailed summary of all drafted changes](#)
[Create snapshot of instruments](#)
[VIDEO: How to use this page](#)

 Last snapshot: never [?](#)

This page allows you to build and customize your data collection instruments one field at a time. You may add new fields or edit existing ones. New fields may be added by clicking the **Add Field** buttons. You can begin editing an existing field by clicking on the **Edit** icon. If you decide that you do not want to keep a field, you can simply delete it by clicking on the **Delete** icon. To reorder the fields, simply **drag and drop** a field to a different position within the form below.

[Return to list of instruments](#)
[Survey settings](#)
[Previous instrument](#)
[Next instrument](#)

 Current instrument: **Health Questions**
[Preview instrument](#)

[Add Field](#)
[Add Matrix of Fields](#)
[Import from Field Bank](#)

Variable: health\_1

**Would you say your health in general is excellent, very good, good, fair, or poor?**

هل يمكنك القول أن صحتك العامة ممتازة، جيدة جداً، جيدة، لا بأس بها، أو سيئة؟

\* must provide value

▼

[Add Field](#)
[Add Matrix of Fields](#)
[Import from Field Bank](#)

Matrix group: diseases

**Have you EVER been told by a doctor or other health professional that you had:**

هل سبق تم إخبارك إطلاقاً من قبل طبيب أو اختصاصي صحي آخر بأنه لديك

|                                                                                                                                                                                                      | Yes نعم               | No لا                 | Don't know لا أعلم    |
|------------------------------------------------------------------------------------------------------------------------------------------------------------------------------------------------------|-----------------------|-----------------------|-----------------------|
| <div style="display: flex; align-items: center;"> <span>Variable: health_2</span> </div> <p><b>Hypertension (high blood pressure) ارتفاع ضغط الدم</b></p> <p><small>* must provide value</small></p> | <input type="radio"/> | <input type="radio"/> | <input type="radio"/> |
| <div style="display: flex; align-items: center;"> <span>Variable: health_3</span> </div> <p><b>High cholesterol ارتفاع الكوليسترول</b></p> <p><small>* must provide value</small></p>                | <input type="radio"/> | <input type="radio"/> | <input type="radio"/> |
| <div style="display: flex; align-items: center;"> <span>Variable: health_4</span> </div> <p><b>Coronary heart disease أمراض القلب التاجية</b></p> <p><small>* must provide value</small></p>         | <input type="radio"/> | <input type="radio"/> | <input type="radio"/> |
| <div style="display: flex; align-items: center;"> <span>Variable: health_5</span> </div> <p><b>Heart attack أزمة قلبية</b></p> <p><small>* must provide value</small></p>                            | <input type="radio"/> | <input type="radio"/> | <input type="radio"/> |
| <div style="display: flex; align-items: center;"> <span>Variable: health_6</span> </div> <p><b>Stroke سكتة دماغية</b></p> <p><small>* must provide value</small></p>                                 | <input type="radio"/> | <input type="radio"/> | <input type="radio"/> |
| <div style="display: flex; align-items: center;"> <span>Variable: health_7</span> </div> <p><b>Asthma ربو</b></p> <p><small>* must provide value</small></p>                                         | <input type="radio"/> | <input type="radio"/> | <input type="radio"/> |
| <div style="display: flex; align-items: center;"> <span>Variable: health_8</span> </div> <p><b>Cancer سرطان</b></p> <p><small>* must provide value</small></p>                                       | <input type="radio"/> | <input type="radio"/> | <input type="radio"/> |



|                                                                                                                                                                                                                                                                                                                                                                                                                                                                                                                                                                                     |                       |                       |                       |
|-------------------------------------------------------------------------------------------------------------------------------------------------------------------------------------------------------------------------------------------------------------------------------------------------------------------------------------------------------------------------------------------------------------------------------------------------------------------------------------------------------------------------------------------------------------------------------------|-----------------------|-----------------------|-----------------------|
|   Variable: health_9                                                                                                                                                                                                                                                                                                                                                                                                |                       |                       |                       |
| <b>Pre-diabetes or borderline diabetes</b> <b>مقدمات السكري</b><br>* must provide value                                                                                                                                                                                                                                                                                                                                                                                                                                                                                             | <input type="radio"/> | <input type="radio"/> | <input type="radio"/> |
|   Variable: health_10                                                                                                                                                                                                                                                                                                                                                                                             |                       |                       |                       |
| <b>Diabetes</b> <b>السكري</b><br>* must provide value                                                                                                                                                                                                                                                                                                                                                                                                                                                                                                                               | <input type="radio"/> | <input type="radio"/> | <input type="radio"/> |
|   Variable: health_11                                                                                                                                                                                                                                                                                                                                                                                             |                       |                       |                       |
| <b>Chronic obstructive pulmonary disease (COPD), emphysema, or chronic bronchitis</b> <b>مرض الانسداد الرئوي المزمن (COPD) ، وانتفاخ الرئة ، أو التهاب الشعب الهوائية المزمن</b><br>* must provide value                                                                                                                                                                                                                                                                                                                                                                            | <input type="radio"/> | <input type="radio"/> | <input type="radio"/> |
|   Variable: health_12                                                                                                                                                                                                                                                                                                                                                                                             |                       |                       |                       |
| <b>Arthritis, rheumatoid arthritis, gout, lupus, or fibromyalgia?</b> <b>التهاب المفاصل ، التهاب المفاصل الروماتزم ، النقرس ، الذئبة ، أو الألم العضلي الليفي</b><br>* must provide value                                                                                                                                                                                                                                                                                                                                                                                           | <input type="radio"/> | <input type="radio"/> | <input type="radio"/> |
|   Variable: health_13                                                                                                                                                                                                                                                                                                                                                                                             |                       |                       |                       |
| <b>Dementia, including Alzheimer's disease</b> <b>الخرف ، بما في ذلك مرض الزهايمر</b><br>* must provide value                                                                                                                                                                                                                                                                                                                                                                                                                                                                       | <input type="radio"/> | <input type="radio"/> | <input type="radio"/> |
|   Variable: health_14                                                                                                                                                                                                                                                                                                                                                                                             |                       |                       |                       |
| <b>Obesity</b> <b>السمنة المفرطة</b><br>* must provide value                                                                                                                                                                                                                                                                                                                                                                                                                                                                                                                        | <input type="radio"/> | <input type="radio"/> | <input type="radio"/> |
|   Variable: health_15                                                                                                                                                                                                                                                                                                                                                                                             |                       |                       |                       |
| <b>Other:</b><br>* must provide value                                                                                                                                                                                                                                                                                                                                                                                                                                                                                                                                               | <input type="radio"/> | <input type="radio"/> | <input type="radio"/> |
| <div> <a href="#">Add Field</a> <a href="#">Add Matrix of Fields</a> <a href="#">Import from Field Bank</a> </div>                                                                                                                                                                                                                                                                                                                                                                                                                                                                  |                       |                       |                       |
|       Variable: health_8_1 <b>Branching logic: [health_8]="1"</b> |                       |                       |                       |

### What kind of cancer?

ما هو نوع السرطان؟

\* must provide value

- ☐ Bladder المثانة
- ☐ Blood الدم
- ☐ Bone العظام
- ☐ Brain الدماغ
- ☐ Breast الثدي
- ☐ Cervix/Cervical عنق الرحم
- ☐ Colon القولون
- ☐ Esophagus/Esoophageal المريء
- ☐ Gallbladder المرارة
- ☐ Kidney الكلى
- ☐ Larynx-trachea الحنجرة- القصبة الهوائية
- ☐ Leukemia لوكيميا
- ☐ Liver الكبد
- ☐ Lung الرئتين
- ☐ Lymphoma الغدد الليمفاوية
- ☐ Melanoma الجلد
- ☐ Mouth/tongue/lip الفم/اللسان/الشفاه
- ☐ Ovary/Ovarian المبيض
- ☐ Pancreas/Pancreatic البنكرياس
- ☐ Prostate البروستاتا
- ☐ Rectum/Rectal المستقيم
- ☐ Skin (non-melanoma) (الجلد (غير الورم الميلاني
- ☐ Skin (don't know what kind) (الجلد (لا أعلم ما هو النوع
- ☐ Soft tissue (muscle or fat) (الأنسجة الرخوة (العضلات أو الدهون
- ☐ Stomach المعدة
- ☐ Testis/Testicular الخصية
- ☐ Throat - pharynx - البلعوم - الحلق
- ☐ Thyroid غدة درقية
- ☐ Uterus/Uterine الرحم
- ☐ Other غير ذلك
- ☐ Don't know لا أعلم

[Add Field](#)
[Add Matrix of Fields](#)
[Import from Field Bank](#)

Variable: health\_10\_1 Branching logic: [health\_10]="1"

### According to your doctor or other health professional, what type of diabetes do you have?

وفقاً لطبيبك أو أخصائي صحي آخر ، ما نوع مرض السكري الذي تعاني منه؟

\* must provide value

- ☐ Type 1 النوع الأول
- ☐ Type 2 النوع الثاني
- ☐ Other type of diabetes نوع آخر من السكري
- ☐ I don't know لا أعلم

[Add Field](#)
[Add Matrix of Fields](#)
[Import from Field Bank](#)

Variable: health\_16

### Have you EVER been told by a doctor or other health professional that you had any type of anxiety disorder?

Different types of anxiety disorders include generalized anxiety disorder, social anxiety disorder, panic disorder, post-traumatic stress disorder, obsessive-compulsive disorder, or phobias.

هل سبق تم إخبارك من قبل طبيب أو اختصاصي صحي بأنه لديك أي نوع من اضطرابات القلق؟

تشمل الأنواع المختلفة من اضطرابات القلق اضطراب القلق العام ، واضطراب القلق الاجتماعي ، واضطراب الهلع ، واضطراب ما بعد الصدمة ، والوسواس القهري ، أو الرهاب.

\* must provide value

- ☐ Yes نعم
- ☐ No لا
- ☐ I don't know لا أعلم

Add Field

Add Matrix of Fields

Import from Field Bank




Variable: health\_17

**Have you EVER been told by a doctor or other health professional that you had any type of depression?**

**Different types of depression include major depressive disorder, bipolar depression, dysthymia, post-partum depression, and seasonal affective disorder.**

- ☐ Yes نعم  
☐ No لا  
☐ I don't know لا أعلم

هل أخبرك طبيب أو أخصائي صحي آخر على الإطلاق أنك مصاب بأي نوع من الاكتئاب؟

تشمل الأنواع المختلفة من الاكتئاب اضطراب الاكتئاب الشديد، والاكتئاب ثنائي القطب، واضطراب عسر المزاج، والاكتئاب ما بعد الولادة، والاضطراب العاطفي القسلي.

\* must provide value

Add Field

Add Matrix of Fields

Import from Field Bank



Matrix group: depression

**In the past 2 weeks, how often have you been bothered by any of the following problems?**

خلال الأسبوعين الماضيين، كم مرة انزعجت من أي من المشاكل التالية؟



Variable: health\_18

لم تحدث في أي يوم  
Not at all

أيام عديدة  
Several days

أكثر من نصف الأيام  
More than half the days

بشدة تقريباً  
Nearly every day

**Little interest or pleasure in doing things**

قلة الاهتمام أو المتعة في فعل الأشياء

\* must provide value

☐
☐
☐
☐


Variable: health\_19

**Feeling down, depressed, or hopeless**

الشعور بالإحباط أو الاكتئاب أو اليأس

\* must provide value

☐
☐
☐
☐


Variable: health\_20

**Trouble falling or staying asleep, OR sleeping too much**

صعوبة في النوم أو البقاء نائماً ، أو النوم كثيراً

\* must provide value

☐
☐
☐
☐


Variable: health\_21

**Feeling tired or having little energy**

الشعور بالتعب أو قلة الطاقة

\* must provide value

☐
☐
☐
☐


Variable: health\_22

**Poor appetite OR overeating**

ضعف الشهية أو الإفراط في تناول الطعام

\* must provide value

☐
☐
☐
☐


Variable: health\_23

**Feeling bad about yourself - or that you are a failure or have let yourself or your family down**

الشعور بالسوء حيال نفسك - أو أنك فشلت أو عائلتك

\* must provide value

☐
☐
☐
☐


Variable: health\_24

**Trouble concentrating on things, such as reading the newspaper or watching television**

صعوبة في التركيز على الأشياء ، مثل قراءة الصحف أو مشاهدة التلفزيون

\* must provide value

☐
☐
☐
☐

|                                                                                                                                                                                                                                                                                 |                                 |                            |                                               |                                    |
|---------------------------------------------------------------------------------------------------------------------------------------------------------------------------------------------------------------------------------------------------------------------------------|---------------------------------|----------------------------|-----------------------------------------------|------------------------------------|
|   Variable: health_25                                                                                           |                                 |                            |                                               |                                    |
| <b>Moving or speaking so slowly that other people have noticed? Or the opposite - being so fidgety or restless that you have been moving around a lot more than usual</b>                                                                                                       |                                 |                            |                                               |                                    |
| هل تتحرك أو تتحدث ببطء شديد حتى أن الآخرين لاحظوا ذلك؟ أو العكس - أن تكون متململاً أو مضطرباً لدرجة أنك تتحرك كثيراً أكثر من المعتاد                                                                                                                                            | <input type="radio"/>           | <input type="radio"/>      | <input type="radio"/>                         | <input type="radio"/>              |
| * must provide value                                                                                                                                                                                                                                                            |                                 |                            |                                               |                                    |
|   Variable: health_26                                                                                         |                                 |                            |                                               |                                    |
| <b>Thoughts that you would be better off dead or of hurting yourself in some way</b>                                                                                                                                                                                            |                                 |                            |                                               |                                    |
| أفكار أنك ستكون أفضل حالاً بعد الموت أو أن تؤذي نفسك بطريقة ما                                                                                                                                                                                                                  | <input type="radio"/>           | <input type="radio"/>      | <input type="radio"/>                         | <input type="radio"/>              |
| * must provide value                                                                                                                                                                                                                                                            |                                 |                            |                                               |                                    |
| <a href="#">Add Field</a> <a href="#">Add Matrix of Fields</a> <a href="#">Import from Field Bank</a>                                                                                                                                                                           |                                 |                            |                                               |                                    |
|    Matrix group: anxiety     |                                 |                            |                                               |                                    |
| <b>Over the past 2 weeks, how often have you been bothered by any of the following problems?</b>                                                                                                                                                                                |                                 |                            |                                               |                                    |
| خلال الأسبوعين الماضيين، كم مرة انزعجت من أي من المشاكل التالية؟                                                                                                                                                                                                                |                                 |                            |                                               |                                    |
|   Variable: health_27                                                                                         |                                 |                            |                                               |                                    |
|                                                                                                                                                                                                                                                                                 | لم تحدث في أي يوم<br>Not at all | أيام عديدة<br>Several days | أكثر من نصف الأيام<br>More than half the days | يومياً تقريباً<br>Nearly every day |
| <b>Feeling nervous, anxious, or on edge</b><br>الشعور بالتوتر أو القلق أو على الحافة                                                                                                                                                                                            | <input type="radio"/>           | <input type="radio"/>      | <input type="radio"/>                         | <input type="radio"/>              |
| * must provide value                                                                                                                                                                                                                                                            |                                 |                            |                                               |                                    |
|   Variable: health_28                                                                                         |                                 |                            |                                               |                                    |
| <b>Not being able to stop or control worrying</b><br>عدم القدرة على التوقف أو السيطرة على القلق                                                                                                                                                                                 | <input type="radio"/>           | <input type="radio"/>      | <input type="radio"/>                         | <input type="radio"/>              |
| * must provide value                                                                                                                                                                                                                                                            |                                 |                            |                                               |                                    |
|   Variable: health_29                                                                                     |                                 |                            |                                               |                                    |
| <b>Worrying too much about different things</b><br>القلق الشديد بشأن أشياء مختلفة                                                                                                                                                                                               | <input type="radio"/>           | <input type="radio"/>      | <input type="radio"/>                         | <input type="radio"/>              |
| * must provide value                                                                                                                                                                                                                                                            |                                 |                            |                                               |                                    |
|   Variable: health_30                                                                                     |                                 |                            |                                               |                                    |
| <b>Trouble relaxing</b><br>صعوبة الاسترخاء                                                                                                                                                                                                                                      | <input type="radio"/>           | <input type="radio"/>      | <input type="radio"/>                         | <input type="radio"/>              |
| * must provide value                                                                                                                                                                                                                                                            |                                 |                            |                                               |                                    |
|   Variable: health_31                                                                                     |                                 |                            |                                               |                                    |
| <b>Being so restless that it is hard to sit still</b><br>أن تكون مضطرباً للغاية بحيث يصعب عليك الجلوس                                                                                                                                                                           | <input type="radio"/>           | <input type="radio"/>      | <input type="radio"/>                         | <input type="radio"/>              |
| * must provide value                                                                                                                                                                                                                                                            |                                 |                            |                                               |                                    |
|   Variable: health_32                                                                                     |                                 |                            |                                               |                                    |
| <b>Becoming easily annoyed or irritable</b><br>الانزعاج بسهولة أو سرعة الانفعال                                                                                                                                                                                                 | <input type="radio"/>           | <input type="radio"/>      | <input type="radio"/>                         | <input type="radio"/>              |
| * must provide value                                                                                                                                                                                                                                                            |                                 |                            |                                               |                                    |
|   Variable: health_33                                                                                     |                                 |                            |                                               |                                    |
| <b>Feeling afraid as if something awful might happen</b><br>الشعور بالخوف كما لو أنك تتوقع حدوث شيء فظيع                                                                                                                                                                        | <input type="radio"/>           | <input type="radio"/>      | <input type="radio"/>                         | <input type="radio"/>              |
| * must provide value                                                                                                                                                                                                                                                            |                                 |                            |                                               |                                    |
| <a href="#">Add Field</a> <a href="#">Add Matrix of Fields</a> <a href="#">Import from Field Bank</a>                                                                                                                                                                           |                                 |                            |                                               |                                    |
|    Matrix group: covid |                                 |                            |                                               |                                    |
| <b>Has the coronavirus or COVID-19 outbreak been so frightening, horrible, or upsetting...</b>                                                                                                                                                                                  |                                 |                            |                                               |                                    |
| هل كان تفشي فيروس كورونا أو كوفيد-19 مخيفاً أو فظيماً أو مزعجاً لدرجة                                                                                                                                                                                                           |                                 |                            |                                               |                                    |

| Variable: health_34                                                                                                                                                   |                       |                       |
|-----------------------------------------------------------------------------------------------------------------------------------------------------------------------|-----------------------|-----------------------|
|                                                                                                                                                                       | Yes نعم               | No لا                 |
| that you had nightmares about it or thought about it when you did not want to?<br>أنه كان لديك كوابيس عنه أو فُكرت فيه عندما كنت لا تريد ذلك؟<br>* must provide value | <input type="radio"/> | <input type="radio"/> |

  

| Variable: health_35                                                                                                                                                                                                |                       |                       |
|--------------------------------------------------------------------------------------------------------------------------------------------------------------------------------------------------------------------|-----------------------|-----------------------|
| that you tried hard not to think about it, or went out of your way to avoid situations that reminded you of it?<br>أنك حاولت جاهداً ألا تفكر في الأمر، وحاولت تجنب المواقف التي تذكرتك به؟<br>* must provide value | <input type="radio"/> | <input type="radio"/> |

  

| Variable: health_36                                                                                                                                         |                       |                       |
|-------------------------------------------------------------------------------------------------------------------------------------------------------------|-----------------------|-----------------------|
| that you were constantly on guard, watchful, or easily startled?<br>أنك كنت في حالة التأهب، أو متيقظاً باستمرار، أو متزعجاً بسهولة؟<br>* must provide value | <input type="radio"/> | <input type="radio"/> |

  

| Variable: health_37                                                                                                                                                  |                       |                       |
|----------------------------------------------------------------------------------------------------------------------------------------------------------------------|-----------------------|-----------------------|
| that you felt numb or detached from others, activities, or your surroundings?<br>أنك شعرت بالخدر أو الانفصال عن الآخرين أو الأنشطة أو محيطك؟<br>* must provide value | <input type="radio"/> | <input type="radio"/> |

[Add Field](#)
[Add Matrix of Fields](#)
[Import from Field Bank](#)

| Variable: health_38                                                                                                                                                                                                                                                                  |                                                                                                                                                                                                                                                                                                           |
|--------------------------------------------------------------------------------------------------------------------------------------------------------------------------------------------------------------------------------------------------------------------------------------|-----------------------------------------------------------------------------------------------------------------------------------------------------------------------------------------------------------------------------------------------------------------------------------------------------------|
| Because of a physical, mental, or emotional condition, do you have difficulty doing errands alone such as visiting a doctor's office or shopping?<br>بسبب حالة جسدية أو نفسية أو عاطفية، هل تجد صعوبة في القيام بمهام وحدك مثل زيارة عيادة الطبيب أو التسوق؟<br>* must provide value | <input type="radio"/> No difficulty لا توجد صعوبة<br><input type="radio"/> Some difficulty توجد القليل من الصعوبة<br><input type="radio"/> A lot of difficulty توجد الكثير من الصعوبة<br><input type="radio"/> Cannot do at all لا أستطيع القيام بذلك أبداً<br><input type="radio"/> I don't know لا أعلم |

[Add Field](#)
[Add Matrix of Fields](#)
[Import from Field Bank](#)

| Variable: health_39                                                                                                                                                                                                                                                                                                                                                                  |                                                                                                                                                                                                                                                                                                           |
|--------------------------------------------------------------------------------------------------------------------------------------------------------------------------------------------------------------------------------------------------------------------------------------------------------------------------------------------------------------------------------------|-----------------------------------------------------------------------------------------------------------------------------------------------------------------------------------------------------------------------------------------------------------------------------------------------------------|
| Because of a physical, mental, or emotional condition, do you have difficulty participating in social activities such as visiting friends, attending clubs and meetings, or going to parties?<br>بسبب حالة جسدية أو نفسية أو عاطفية، هل تجد صعوبة في المشاركة في الأنشطة الاجتماعية، مثل زيارة الأصدقاء، أو حضور الأندية والاجتماعات، أو الذهاب إلى الحفلات؟<br>* must provide value | <input type="radio"/> No difficulty لا توجد صعوبة<br><input type="radio"/> Some difficulty توجد القليل من الصعوبة<br><input type="radio"/> A lot of difficulty توجد الكثير من الصعوبة<br><input type="radio"/> Cannot do at all لا أستطيع القيام بذلك أبداً<br><input type="radio"/> I don't know لا أعلم |

[Add Field](#)
[Add Matrix of Fields](#)
[Import from Field Bank](#)

| Variable: health_40                                                                                                                              |                                                       |
|--------------------------------------------------------------------------------------------------------------------------------------------------|-------------------------------------------------------|
| Do you smoke (cigarettes, hookah, other tobacco products)?<br>هل تدخن (تدخين السجائر، الأرجيلة، وغيرها من منتجات التبغ)؟<br>* must provide value | <input type="radio"/> Yes<br><input type="radio"/> No |

[Add Field](#)
[Add Matrix of Fields](#)
[Import from Field Bank](#)

| Variable: health_40_1 Branching logic: [health_40]="1"                                                                                                                  |                                                                                                                                          |
|-------------------------------------------------------------------------------------------------------------------------------------------------------------------------|------------------------------------------------------------------------------------------------------------------------------------------|
| How often do you smoke (cigarettes, hookah, other tobacco products)?<br>كم مرة تقوم بالتدخين (تدخين السجائر، الأرجيلة، وغيرها من منتجات التبغ)؟<br>* must provide value | <input type="radio"/> Every day كل يوم<br><input type="radio"/> Some days بعض الأيام<br><input type="radio"/> Not at all لا أدخن إطلاقاً |

[Add Field](#)
[Add Matrix of Fields](#)
[Import from Field Bank](#)

Variable: health\_41    Branching logic: [health\_40]="1"

**Since coronavirus or COVID-19 started, are you smoking more, the same, or fewer than you did before coronavirus started?**

منذ بدء انتشار فيروس كورونا أو كوفيد-19، هل أصبحت تدخن أكثر، أو بنفس الكمية، أو أقل مما كنت قبل بداية انتشار فيروس كورونا؟

☐ Smoking more    أَدخَن أكثر

☐ Smoking less    أَدخَن أقل

☐ Smoking the same amount    أَدخَن بنفس الكمية

☐ I have never smoked    لا أَدخَن إطلاقاً

\* must provide value

[Add Field](#)
[Add Matrix of Fields](#)
[Import from Field Bank](#)

Variable: health\_42

**Do you drink alcohol?**

هل تشرب الكحول؟

☐ Yes

☐ No

\* must provide value

[Add Field](#)
[Add Matrix of Fields](#)
[Import from Field Bank](#)

Variable: health\_42\_1    Branching logic: [health\_42]="1"

**How often do you drink alcohol?**

كم مرة تشرب الكحول؟

☐ Every day    كل يوم

☐ Some days    بعض الأيام

☐ Not at all    لا أَدخَن إطلاقاً

\* must provide value

[Add Field](#)
[Add Matrix of Fields](#)
[Import from Field Bank](#)

Variable: health\_43    Branching logic: [health\_42]="1"

**Since coronavirus or COVID-19 started, are you drinking more, the same, or less alcohol than you did before coronavirus started?**

منذ بدء انتشار فيروس كورونا أو كوفيد-19، هل أصبحت تشرب الكحول أكثر، أو بنفس الكمية، أو أقل مما كنت قبل بداية انتشار فيروس كورونا؟

☐ Drinking more alcohol    أَشرب الكحول أكثر

☐ Drinking less alcohol    أَشرب الكحول أقل

☐ Drinking the same amount of alcohol    أَشرب الكحول بنفس الكمية

☐ I have never had alcohol    لا أَشرب الكحول إطلاقاً

\* must provide value

[Add Field](#)
[Add Matrix of Fields](#)
[Import from Field Bank](#)

[https://redcap.pharmacy.uh.edu/redcap\\_v11.3.0/Design/online\\_designer.php?pid=61&page=health\\_questions](https://redcap.pharmacy.uh.edu/redcap_v11.3.0/Design/online_designer.php?pid=61&page=health_questions)

7/7

[Online Designer](#)

Since this project is currently in **PRODUCTION**, changes will not be made in real time. [Tell me more](#)

[Submit Changes for Review](#)

 Fields to be added: **0** / Total resulting field count: **129**

 Fields to be deleted: **0** / Existing field count: **129**
[Remove all drafted changes](#)
[View detailed summary of all drafted changes](#)
[Create snapshot of instruments](#)
[VIDEO: How to use this page](#)

 Last snapshot: never [?](#)

This page allows you to build and customize your data collection instruments one field at a time. You may add new fields or edit existing ones. New fields may be added by clicking the **Add Field** buttons. You can begin editing an existing field by clicking on the **Edit** icon. If you decide that you do not want to keep a field, you can simply delete it by clicking on the **Delete** icon. To reorder the fields, simply **drag and drop** a field to a different position within the form below.

[Return to list of instruments](#)
[Survey settings](#)
[Previous instrument](#)
[Next instrument](#)

 Current instrument: **COVID 19 Vaccination**
[Preview instrument](#)

[Add Field](#)
[Add Matrix of Fields](#)
[Import from Field Bank](#)

Variable: vaccine\_3

**Are you, or have you been, infected with the novel coronavirus (COVID-19)?**

هل أنت الآن مصاب، أو كنت مصاباً ، بفيروس كورونا المستجد (كوفيد-19)؟

\* must provide value

☐ Yes, tested and the result was positive ( نعم، تم فحصي ونتيجة ( الفحص إيجابية ) )

☐ Yes, suspected but not confirmed by a test ( نعم، تم الاشتباه ولكن (دون التأكد من خلال الفحص ) )

☐ No, tested and the result was negative ( لا، تم الفحص ونتيجة الفحص (سلبية ) )

☐ No ( لا )

☐ Don't know ( لا أعلم )

☐ Prefer not to say (أفضل عدم الإجابة)

[Add Field](#)
[Add Matrix of Fields](#)
[Import from Field Bank](#)

Variable: vaccine\_4

**Do you know people in your immediate social environment (family, friends, relatives etc.) who are or have been infected with the novel coronavirus (COVID-19)?**

هل تعرف أشخاصاً في بيئتك الاجتماعية المباشرة (العائلة، الأصدقاء، الأقارب، الخ.) مصابون أو كانوا مصابين بفيروس كورونا المستجد (كوفيد-19)؟

\* must provide value

☐ Yes, confirmed ( نعم، مؤكدة بفحص )

☐ Yes, suspected but not confirmed by a test ( نعم، مشتبه بهم لكن دون (التأكد من خلال الفحص ) )

☐ No, tested and the result was negative ( لا، تم الفحص والنتيجة سلبية )

☐ No ( لا )

☐ Don't know ( لا أعلم )

☐ Prefer not to say (أفضل عدم الإجابة)

[Add Field](#)
[Add Matrix of Fields](#)
[Import from Field Bank](#)

Variable: vaccine\_5

**How would you rate your knowledge level on how to prevent spread of the novel coronavirus?**

كيف يمكنك تقييم درجة معرفتك بكيفية منع انتشار فيروس كورونا المستجد؟

\* must provide value

☐ Excellent ( ممتازة )

☐ Good ( جيدة )

☐ Average (متوسطة )

☐ Poor ( ضعيفة )

☐ Terrible ( سيئة )

[Add Field](#)
[Add Matrix of Fields](#)
[Import from Field Bank](#)

Variable: vaccine\_6

**What do you consider your own probability/risk of getting infected with the novel coronavirus?**

كم تقدر احتمالية/خطورة إصابتك بعدوى فيروس كورونا المستجد؟

\* must provide value

☐ Extremely likely ( محتمل جداً )

☐ Somewhat likely ( محتمل قليلاً )

☐ Neither likely nor unlikely ( ليس محتمل وليس غير محتمل )

☐ Somewhat unlikely ( غير محتمل قليلاً )

☐ Extremely unlikely ( غير محتمل جداً )

☐ I don't know ( لا أعلم )

Add Field
Add Matrix of Fields
Import from Field Bank

Variable: vaccine\_7

**How severe would contracting the novel coronavirus be for you? (How seriously ill do you think you would be?)**

ما هي مدى خطورة إصابتك بعدوى فيروس كورونا المستجد بالنسبة إليك؟ (كيف تتوقع أن تكون إصابتك خطيرة؟)

\* must provide value

☐ Extremely severe خطيرة للغاية  
☐ Somewhat severe خطيرة نوعاً ما  
☐ Neither severe nor mild ليست خطيرة أو خفيفة  
☐ Somewhat mild خفيفة نوعاً ما  
☐ Extremely mild خفيفة للغاية  
☐ I don't know لا أعلم

Add Field
Add Matrix of Fields
Import from Field Bank

Variable: vaccine\_8

**I know how to protect myself from coronavirus.**

أعرف كيفية حماية نفسي من فيروس كورونا.

\* must provide value

☐ Strongly agree موافق بشدة  
☐ Somewhat agree موافق نوعاً ما  
☐ Neither agree nor disagree لست موافق أو غير موافق  
☐ Somewhat disagree غير موافق نوعاً ما  
☐ Strongly disagree غير موافق بشدة

Add Field
Add Matrix of Fields
Import from Field Bank

Variable: vaccine\_9

**For me avoiding an infection with the novel coronavirus in the current situation is...**

أعتبر تجنب الإصابة بعدوى فيروس كورونا المستجد في الوضع الحالي أمر...

\* must provide value

☐ Extremely easy سهل للغاية  
☐ Somewhat easy سهلاً نوعاً ما  
☐ Neither easy nor difficult ليس سهلاً أو صعباً  
☐ Somewhat difficult صعب نوعاً ما  
☐ Extremely difficult صعب للغاية  
☐ I don't know لا أعلم

Add Field
Add Matrix of Fields
Import from Field Bank

Matrix group: confidence

**How much confidence do you have in the below individuals and organizations that they can handle the novel coronavirus well?**

ما هي نسبة ثقافتك بالأشخاص والمنظمات أدناه حول قدرتهم على التعامل مع فيروس كورونا المستجد بشكل جيد؟

|                                                                                   | A great deal<br>نسبة عالية جداً | A lot<br>نسبة كبيرة   | A moderate amount<br>نسبة متوسطة | A little<br>نسبة قليلة | None at all<br>لا أثق إطلاقاً |
|-----------------------------------------------------------------------------------|---------------------------------|-----------------------|----------------------------------|------------------------|-------------------------------|
| <b>Your family doctor</b> طبيب العائلة<br>* must provide value                    | <input type="radio"/>           | <input type="radio"/> | <input type="radio"/>            | <input type="radio"/>  | <input type="radio"/>         |
| <b>Your employer</b> عملك<br>* must provide value                                 | <input type="radio"/>           | <input type="radio"/> | <input type="radio"/>            | <input type="radio"/>  | <input type="radio"/>         |
| <b>Media</b> الإعلام<br>* must provide value                                      | <input type="radio"/>           | <input type="radio"/> | <input type="radio"/>            | <input type="radio"/>  | <input type="radio"/>         |
| <b>Hospitals</b> المستشفيات<br>* must provide value                               | <input type="radio"/>           | <input type="radio"/> | <input type="radio"/>            | <input type="radio"/>  | <input type="radio"/>         |
| <b>The president</b> الرئيس<br>* must provide value                               | <input type="radio"/>           | <input type="radio"/> | <input type="radio"/>            | <input type="radio"/>  | <input type="radio"/>         |
| <b>Local public health authorities</b> سلطات الصحة العامة<br>* must provide value | <input type="radio"/>           | <input type="radio"/> | <input type="radio"/>            | <input type="radio"/>  | <input type="radio"/>         |
| <b>Schools</b> المدارس<br>* must provide value                                    | <input type="radio"/>           | <input type="radio"/> | <input type="radio"/>            | <input type="radio"/>  | <input type="radio"/>         |



|                                                                                                                                                                                                                                                                                                                                                                                                                     |                                     |                                         |                                                               |                                                |                                            |
|---------------------------------------------------------------------------------------------------------------------------------------------------------------------------------------------------------------------------------------------------------------------------------------------------------------------------------------------------------------------------------------------------------------------|-------------------------------------|-----------------------------------------|---------------------------------------------------------------|------------------------------------------------|--------------------------------------------|
|   Variable: vaccine_17                                                                                                                                                                                                                              |                                     |                                         |                                                               |                                                |                                            |
| Universities الجامعات                                                                                                                                                                                                                                                                                                                                                                                               | <input type="radio"/>               | <input type="radio"/>                   | <input type="radio"/>                                         | <input type="radio"/>                          | <input type="radio"/>                      |
| * must provide value                                                                                                                                                                                                                                                                                                                                                                                                |                                     |                                         |                                                               |                                                |                                            |
|   Variable: vaccine_18                                                                                                                                                                                                                            |                                     |                                         |                                                               |                                                |                                            |
| Government الحكومة                                                                                                                                                                                                                                                                                                                                                                                                  | <input type="radio"/>               | <input type="radio"/>                   | <input type="radio"/>                                         | <input type="radio"/>                          | <input type="radio"/>                      |
| * must provide value                                                                                                                                                                                                                                                                                                                                                                                                |                                     |                                         |                                                               |                                                |                                            |
|   Variable: vaccine_19                                                                                                                                                                                                                            |                                     |                                         |                                                               |                                                |                                            |
| Police الشرطة                                                                                                                                                                                                                                                                                                                                                                                                       | <input type="radio"/>               | <input type="radio"/>                   | <input type="radio"/>                                         | <input type="radio"/>                          | <input type="radio"/>                      |
| * must provide value                                                                                                                                                                                                                                                                                                                                                                                                |                                     |                                         |                                                               |                                                |                                            |
|   Variable: vaccine_20                                                                                                                                                                                                                            |                                     |                                         |                                                               |                                                |                                            |
| Church or mosque الكنيسة أو المسجد                                                                                                                                                                                                                                                                                                                                                                                  | <input type="radio"/>               | <input type="radio"/>                   | <input type="radio"/>                                         | <input type="radio"/>                          | <input type="radio"/>                      |
| * must provide value                                                                                                                                                                                                                                                                                                                                                                                                |                                     |                                         |                                                               |                                                |                                            |
| <a href="#">Add Field</a> <a href="#">Add Matrix of Fields</a> <a href="#">Import from Field Bank</a>                                                                                                                                                                                                                                                                                                               |                                     |                                         |                                                               |                                                |                                            |
|     Variable: vaccine_21                                                        |                                     |                                         |                                                               |                                                |                                            |
| <b>I follow the recommendations from local and national authorities to prevent spread of novel coronavirus.</b>                                                                                                                                                                                                                                                                                                     |                                     |                                         |                                                               |                                                |                                            |
| <input type="radio"/> Very much so أقوم بذلك كثيراً<br><input type="radio"/> A moderate amount أقوم بذلك بشكل معتدل<br><input type="radio"/> A little قليلاً أقوم بذلك قليلاً<br><input type="radio"/> Not at all لا أقوم بذلك إطلاقاً                                                                                                                                                                              |                                     |                                         |                                                               |                                                |                                            |
| أقوم باتتباع توصيات الجهات المحلية والدولية للحد من انتشار فيروس كورونا المستجد.<br>* must provide value                                                                                                                                                                                                                                                                                                            |                                     |                                         |                                                               |                                                |                                            |
| <a href="#">Add Field</a> <a href="#">Add Matrix of Fields</a> <a href="#">Import from Field Bank</a>                                                                                                                                                                                                                                                                                                               |                                     |                                         |                                                               |                                                |                                            |
|     Variable: vaccine_21_1                                                      |                                     |                                         |                                                               |                                                |                                            |
| <b>Did you receive COVID-19 vaccine?</b>                                                                                                                                                                                                                                                                                                                                                                            |                                     |                                         |                                                               |                                                |                                            |
| هل تلقيت مطعوم فيروس كوفيد-19<br><input type="radio"/> Yes<br><input type="radio"/> No                                                                                                                                                                                                                                                                                                                              |                                     |                                         |                                                               |                                                |                                            |
| * must provide value                                                                                                                                                                                                                                                                                                                                                                                                |                                     |                                         |                                                               |                                                |                                            |
| <a href="#">Add Field</a> <a href="#">Add Matrix of Fields</a> <a href="#">Import from Field Bank</a>                                                                                                                                                                                                                                                                                                               |                                     |                                         |                                                               |                                                |                                            |
|     Variable: vaccine_21_1_1 <b>Branching logic: [vaccine_21_1]="1"</b> |                                     |                                         |                                                               |                                                |                                            |
| <b>Which vaccine did you receive?</b>                                                                                                                                                                                                                                                                                                                                                                               |                                     |                                         |                                                               |                                                |                                            |
| أي مطعوم تلقيت؟<br><input type="radio"/> Moderna<br><input type="radio"/> Pfizer<br><input type="radio"/> Johnson and Johnson<br><input type="radio"/> Other<br><input type="radio"/> I don't know                                                                                                                                                                                                                  |                                     |                                         |                                                               |                                                |                                            |
| <a href="#">Add Field</a> <a href="#">Add Matrix of Fields</a> <a href="#">Import from Field Bank</a>                                                                                                                                                                                                                                                                                                               |                                     |                                         |                                                               |                                                |                                            |
|    <b>Matrix group: opinion</b>                                                                                                                            |                                     |                                         |                                                               |                                                |                                            |
| <b>Please give your opinion on the following statements:</b>                                                                                                                                                                                                                                                                                                                                                        |                                     |                                         |                                                               |                                                |                                            |
| نرجو تقديم رأيك حول الجمل التالية                                                                                                                                                                                                                                                                                                                                                                                   |                                     |                                         |                                                               |                                                |                                            |
|   Variable: vaccine_23                                                                                                                                                                                                                        |                                     |                                         |                                                               |                                                |                                            |
|                                                                                                                                                                                                                                                                                                                                                                                                                     | <b>Strongly agree</b><br>موافق بشدة | <b>Somewhat agree</b><br>موافق نوعاً ما | <b>Neither agree nor disagree</b><br>لست موافقاً أو غير موافق | <b>Somewhat disagree</b><br>غير موافق نوعاً ما | <b>Strongly disagree</b><br>غير موافق بشدة |
| <b>From now on, anyone moving in a public area should be required to wear a face mask.</b><br>منذ هذه اللحظة، يجب على أي شخص يتنقل في المناطق العامة أن يرتدي كمامة الوجه<br>* must provide value                                                                                                                                                                                                                   | <input type="radio"/>               | <input type="radio"/>                   | <input type="radio"/>                                         | <input type="radio"/>                          | <input type="radio"/>                      |
|   Variable: vaccine_24                                                                                                                                                                                                                        |                                     |                                         |                                                               |                                                |                                            |
| <b>More tests for coronavirus infection should be carried out in the population</b><br>يجب إجراء المزيد من الفحوصات لفيروس كورونا للسكان<br>* must provide value                                                                                                                                                                                                                                                    | <input type="radio"/>               | <input type="radio"/>                   | <input type="radio"/>                                         | <input type="radio"/>                          | <input type="radio"/>                      |
|   Variable: vaccine_25                                                                                                                                                                                                                        |                                     |                                         |                                                               |                                                |                                            |
| <b>I think that restrictions currently being implemented are greatly exaggerated.</b><br>أعتقد أن القيود المفروضة حالياً مبالغ فيها كثيراً<br>* must provide value                                                                                                                                                                                                                                                  | <input type="radio"/>               | <input type="radio"/>                   | <input type="radio"/>                                         | <input type="radio"/>                          | <input type="radio"/>                      |



Variable: vaccine\_26

**You should only be allowed to leave your house for professional, health, or urgent reasons.** يجب أن يسمح بمغادرة المنزل لأسباب مهنية، صحية، أو عاجلة

\* must provide value

☐
☐
☐
☐
☐

Add Field Add Matrix of Fields Import from Field Bank




Matrix group: done\_during\_pandemic

**Have you done the following during the pandemic?** هل قمت بما يلي خلال انتشار الوباء...؟



Variable: vaccine\_27

**I already did that** فعلت ذلك مسبقاً **I plan to do that** أخطط لفعل ذلك **I don't plan to do that** لا أخطط لفعل ذلك

**Bought food supplies on a large scale** شراء المون الغذائية بكميات كبيرة

\* must provide value

☐
☐
☐



Variable: vaccine\_28

**Exercised less than I usually do** ممارسة الرياضة أقل من العادة

\* must provide value

☐
☐
☐



Variable: vaccine\_29

**Ate more unhealthy food than I usually do** تناول الأطعمة غير الصحية أكثر من العادة

\* must provide value

☐
☐
☐



Variable: vaccine\_30

**Avoided going to the doctor with issues that could be postponed (e.g. vaccination or a check-up)** تجنب الذهاب إلى (الطبيب بسبب مشاكل يمكن تأجيلها (مثل التطعيم أو الفحص

\* must provide value

☐
☐
☐



Variable: vaccine\_31

**Asked family members or friends not to visit me** الطلب من أفراد العائلة أو الأصدقاء عدم زيارتي

\* must provide value

☐
☐
☐



Variable: vaccine\_32

**Bought personal protective equipment (masks, gloves)** شراء معدات الوقاية الشخصية (القفازات)

\* must provide value

☐
☐
☐

Add Field Add Matrix of Fields Import from Field Bank

Since this project is currently in **PRODUCTION**, changes will not be made in real time. [Tell me more](#)

Submit Changes for Review

Fields to be added: **0** / Total resulting field count: **129**

Fields to be deleted: **0** / Existing field count: **129**

[Remove all drafted changes](#)

[View detailed summary of all drafted changes](#)

[Create snapshot of instruments](#)

[VIDEO: How to use this page](#)

Last snapshot: never ?

This page allows you to build and customize your data collection instruments one field at a time. You may add new fields or edit existing ones. New fields may be added by clicking the **Add Field** buttons. You can begin editing an existing field by clicking on the **Edit** icon. If you decide that you do not want to keep a field, you can simply delete it by clicking on the **Delete** icon. To reorder the fields, simply **drag and drop** a field to a different position within the form below.

[Return to list of instruments](#)

[Survey settings](#)

[Previous instrument](#)

Current instrument: **COVID-19 Vaccination 2**

[Preview instrument](#)

Add Field
Add Matrix of Fields
Import from Field Bank

Variable: covid2\_1

**How susceptible do you consider yourself to an infection with the novel coronavirus?**

كم تقدر قابلية إصابتك بعدوى فيروس كورونا المستجد؟

\* must provide value

☐ Extremely susceptible قابل جداً  
☐ Somewhat susceptible قابل قليلاً  
☐ Neither susceptible or not قابل وليس غير قابل  
☐ Somewhat not susceptible غير قابل قليلاً  
☐ Extremely unsusceptible غير قابل جداً

Add Field
Add Matrix of Fields
Import from Field Bank

Variable: covid2\_2

**Not seeing my family living outside my own home is emotionally:**

الامتناع عن رؤية أفراد عائلتي خارج منزلي الخاص هو أمر

\* must provide value

☐ Extremely easy سهيل للغاية  
☐ Somewhat easy سهيل نوعاً ما  
☐ Neither easy nor difficult ليس سهلاً أو صعباً  
☐ Somewhat difficult صعب نوعاً ما  
☐ Extremely difficult صعب للغاية

Add Field
Add Matrix of Fields
Import from Field Bank

Variable: covid2\_3

**Not seeing my friends is emotionally:**

الامتناع عن رؤية أصدقائي هو أمر

\* must provide value

☐ Extremely easy سهيل للغاية  
☐ Somewhat easy سهيل نوعاً ما  
☐ Neither easy nor difficult ليس سهلاً أو صعباً  
☐ Somewhat difficult صعب نوعاً ما  
☐ Extremely difficult صعب للغاية

Add Field
Add Matrix of Fields
Import from Field Bank

Variable: covid2\_4

**The novel coronavirus to me feels:**

أشعر بأن فيروس كورونا المستجد

\* must provide value

☐ Close to me قريب مني  
☐ Neither close nor far ليس قريباً ولا بعيداً  
☐ Far from me بعيد عني

Add Field
Add Matrix of Fields
Import from Field Bank

Variable: covid2\_5

**The novel coronavirus to me feels like it is**

أشعر بأن انتشار فيروس كورونا بالنسبة لي

\* must provide value

☐ Spreading slowly ينتشر ببطء  
☐ Spreading neither slowly or fast لا ينتشر بسرعة ولا ينتشر ببطء  
☐ Spreading fast ينتشر بسرعة

Add Field
Add Matrix of Fields
Import from Field Bank

Variable: covid2\_6

**The novel coronavirus is:**

☐ Something I think about all the time
أمر أفكر به في جميع الأوقات
☐ Something I think about sometimes
أمر أفكر به في بعض الأحيان
☐ Something I almost never think about
أمر أكاد لا أفكر به إطلاقاً

**إن فيروس كورونا المستجد هو:**

☐ Something I think about all the time
أمر أفكر به في جميع الأوقات
☐ Something I think about sometimes
أمر أفكر به في بعض الأحيان
☐ Something I almost never think about
أمر أكاد لا أفكر به إطلاقاً

\* must provide value

Add Field
Add Matrix of Fields
Import from Field Bank

Variable: covid2\_7

**The novel coronavirus is:**

☐ Media hyped
أحدث ضجة إعلامية
☐ Not media hyped
لم يحدث ضجة إعلامية
☐ Not media hyped enough
لم يحدث ضجة إعلامية بالشكل الكافي

**إن فيروس كورونا المستجد هو:**

☐ Media hyped
أحدث ضجة إعلامية
☐ Not media hyped
لم يحدث ضجة إعلامية
☐ Not media hyped enough
لم يحدث ضجة إعلامية بالشكل الكافي

\* must provide value

Add Field
Add Matrix of Fields
Import from Field Bank

Variable: covid2\_8

**The novel coronavirus is:**

☐ Worrying
مثير للقلق
☐ Not worrying
غير مثير للقلق
☐ Neither
لا شيء مما ذكر

**إن فيروس كورونا المستجد هو:**

☐ Worrying
مثير للقلق
☐ Not worrying
غير مثير للقلق
☐ Neither
لا شيء مما ذكر

\* must provide value

Add Field
Add Matrix of Fields
Import from Field Bank

Variable: covid2\_9

**The novel coronavirus is:**

☐ Stressful
مثير للتوتر
☐ Not stressful
غير مثير للتوتر
☐ Neither
لا شيء مما ذكر

**إن فيروس كورونا المستجد هو:**

☐ Stressful
مثير للتوتر
☐ Not stressful
غير مثير للتوتر
☐ Neither
لا شيء مما ذكر

\* must provide value

Add Field
Add Matrix of Fields
Import from Field Bank

Variable: covid2\_10

**The novel coronavirus is:**

☐ Something that is making me depressed
أمر يجعلني أشعر بالاكئاب
☐ Something that is not affecting my mood
أمر لا يؤثر بحالي (المزاجية)
☐ Neither
لا شيء مما ذكر

**إن فيروس كورونا المستجد هو:**

☐ Something that is making me depressed
أمر يجعلني أشعر بالاكئاب
☐ Something that is not affecting my mood
أمر لا يؤثر بحالي (المزاجية)
☐ Neither
لا شيء مما ذكر

\* must provide value

Add Field
Add Matrix of Fields
Import from Field Bank

Variable: covid2\_11

**Thank you for taking the time to complete the Survey for Arab Health in Houston. Remember that your responses will remain anonymous and secure. If you have any questions or concerns about your participation please contact the principal investigator Dr. Samina Salim (ssalim@uh.edu).**

**Feel free to send the survey to others!**

نشكرك على وقتك لتعبئة استبيان صحة العرب في الولايات المتحدة. نذكر أن إجاباتك ستبقى مجهولة الهوية ومحفوظة بأمان. إذا كان لديك أي أسئلة حول مشاركتك، نرجو التواصل مع الباحثة الرئيسية الدكتورة سامينا سالم (ssalim@uh.edu).

Add Field
Add Matrix of Fields
Import from Field Bank
